# Supplementary material for: Generation of transgenic marmosets expressing genetically encoded calcium indicators
Source: PubMed Central journal article supplement (PMC5057151; doi:10.1038/srep34931), 2016-10-11
Supplement: srep34931-s1.pdf [file srep34931-s1.pdf]

1 **Supplementary Information**

2 Generation of transgenic marmosets expressing genetically encoded calcium indicators

3 Jung Eun Park<sup>1</sup>, Xian Feng Zhang<sup>1</sup>, Sang-Ho Choi<sup>1</sup>, Junko Okahara<sup>2</sup>, Erika Sasaki<sup>2,3</sup>, Afonso C.  
4 Silva<sup>1,\*</sup>

5

6 <sup>1</sup> Cerebral Microcirculation Section, Laboratory of Functional and Molecular Imaging, National  
7 Institute of Neurological Disorders and Stroke, National Institutes of Health, Bethesda, MD, USA

8 <sup>2</sup> Department of Applied Developmental Biology, Central Institute for Experimental Animals,  
9 Tonomachi, Kawasaki, Kanagawa 210-0821, Japan

10 <sup>3</sup> Keio advanced Research Center, Keio University, Shinanomachi, Shinjuku-ku, Tokyo 160-  
11 8582, Japan

12

13 Supplementary Table S1. Genomic integration loci of the transgene in transgenic marmosets.

| Tg ID | Genomic location | Overlapping genes  | Length | %ID   | Sequence (Bold: marmoset sequence, Italic: lentiviral sequence)                                                                                                                                                                                                                                                                                                     |
|-------|------------------|--------------------|--------|-------|---------------------------------------------------------------------------------------------------------------------------------------------------------------------------------------------------------------------------------------------------------------------------------------------------------------------------------------------------------------------|
| TG-Y  | 9:64243780       | ATXN7L3B           | 511    | 99.61 | <b>CCCTCTCCGCAGTCGTTTACAAATTTAAAGCTTGGAAATATTTTTTGCATCAGTTTCGT</b>                                                                                                                                                                                                                                                                                                  |
| TG-E  | 2:197330287      | Intergenic region  | 218    | 100   | <i>ATCTTGTCTTCGTTGGGAGTGAATTAGCCCTTCCACTAACCGAGTACC</i><br><b>AGAAATTTGGTTAATACACCCTTGTTAGTTGAATGAACAATGGCC</b><br><b>CATTTCAAAAAGAAAAGCCAGTAATCTTGTGGGAGGA</b>                                                                                                                                                                                                     |
|       | 7:136607274      | RTCA               | 159    | 100   | <i>GCAAAAAGCAGATCTTGTCTTCGTTGGGAGTGAATTAGCCCTTCCAATT</i><br><b>ATCCAGTGGTTTTAACATCTATTGATGATTTTTCTCTGCATCAGT</b><br><b>TATTTCAAT</b>                                                                                                                                                                                                                                |
|       | 11:32419859      | NCAPD3             | 540    | 99.81 | <i>GAGAGACCCAGTACAAGCAAAAAGCAGATCTTGTCTTCGTTGGGAGTGA</i><br><i>ATTAGCCCTTCCGATCCTATAATGCACAGGAAAAGATTTCTTAAAG</i><br><b>ATACTTTAATCATTAAAGAAAACCCTGTCAAAGTGAATTTATCAA</b><br><b>AA</b>                                                                                                                                                                              |
|       | 16:72233830      | Intergenic region  | 142    | 89.44 | <i>ATATAAGCAGCGCGTTTTGCCTGTACTGGGTCTCTCTGGTTAGACCAGAT</i><br><i>CTGAGCCTGGGAGCTCGAATTCTCTGGCCGTCGTTTTACAACGTCGT</i><br><b>GACTGGGAAAACCCTGGCGTTACCACTTAATCGCCTTGC</b>                                                                                                                                                                                               |
| TG-S  | 2:197330288      | Intergenic region  | 206    | 100   | <b>GTGTATTAACCAATTTCTGGTACTCGGTTAGTGAAGGGCTAATTC</b><br><i>ACTCCAACGGAAGACAAGATCTGCTTTTT</i>                                                                                                                                                                                                                                                                        |
|       | 9:35209886       | BICD1              | 435    | 99.77 | <b>ACAATGAACTAAATGAATACTGACAGCAGGGTTTCTGATTTACT</b><br><b>TATCTCATTATTGGAAGGGCTAATTCCTCCAACGAAGACAA</b>                                                                                                                                                                                                                                                             |
|       | 11:107855778     | Intergenic region  | 720    | 99.58 | <i>AGCAGATCTTGTCTTCGTTGGGAGTGAATTAGCCCTTCCATACACAAAT</i><br><b>AAAGCAAATATCCAGGCATGGTGGCACGTGCTTGAAGTCCAG</b><br><b>CT</b>                                                                                                                                                                                                                                          |
| TG-L  | 1:126737526      | Intergenic region  | 820    | 98.66 | <i>AAAAGCAGATCTTGTCTTCGTTGGGAGTGAATTAGCCCTTCCAGAATC</i><br><b>ATCCTTTTTTATGGCTCCATAGTATTCTATGGTGTATGTGTGCCA</b><br><b>TATTTCTTTATCTAGTCTATCATTGATGGGCATTTGGGTGGCT</b><br><b>AGGTTGCAGTGAGCCAAGATAGTGTCACTGAACTCCATCCTGGG</b><br><b>CAACACAGCAAGACTGTGTCTCAAAAAACAAAATAGGCTGTGG</b><br><i>AAGGACTAATTCCTCCAACGAAGACAAGATCTGCTTTTTGCTGTACT</i><br><i>GGGTCTCTCGTT</i> |
|       | 2:72750672       | MA_M002_JSM116D85R | 460    | 99.78 | <i>TACAAGCAAAAAGCAGATCTTGTCTTCGTTGGGAGTGAATTAGCCCTTCC</i><br><b>AAAACCCCATTAACAAGGGAAAGGGGATAAAAAATAAATTTTT</b><br><b>TT</b>                                                                                                                                                                                                                                        |
|       | 14:80829389      | ZNF512             | 528    | 99.62 | <i>GATCTGGTCTAACCAGAGAGACCCAGTACAAGCAAAAAGCAGATCTTGT</i><br><i>CTTCGTTGGGAGTGAATTAGCCCTTCCAGGTTTCTGGTGTCTTTGA</i><br><b>TGACACACGATGTCTCGGAACAAA</b>                                                                                                                                                                                                                |
|       | 15:33065540      | IL17RD             | 208    | 99.04 | <i>CTTGTCTTCGTTGGGGTGAATTAGCCCTTCCAGATAGGAAACCCCAA</i><br><b>TTAAGTGAGGTACTATCTTCTCAAAGATTTTCACTTTTCA</b>                                                                                                                                                                                                                                                           |
| TG-D1 | 6:47458599       | TLK1               | 510    | 99.22 | <b>GAATTCACCTCTATATAATTCATCTATGTAACAAAACCACTCGT</b><br><i>ACCTGGAAGGGCTAATTCCTCCAACGAAGACGAGAT</i>                                                                                                                                                                                                                                                                  |
|       | 7:67759963       | Intergenic region  | 523    | 99.81 | <i>CGGGCACACACTACTTGAAGAACCTAAAACATTCAGGAAAAGTGAAC</i><br><b>AGTCCCAACTTACAAGTGAATTTCTGACTATGAAAGA</b><br><b>GA</b>                                                                                                                                                                                                                                                 |
| TG-D2 | 2:110737191      | LNPEP              | 705    | 100   | <i>ATCTTGTCTTCGTTGGGAGTGAATTAGCCCTTCCAGATAGGAAACCCC</i><br><b>AATTAAGTGAGGTACTATCTTCTCAAAGATTTTCACTTTTCAT</b><br><b>TAGCAGACTTCTGTTTTA</b>                                                                                                                                                                                                                          |
|       | 6:47458599       | TLK1               | 76     | 100   | <i>TCTCTGGTTTTCCCTTTCGTTTTCAAGTCCCTGTTCCGGGCGCCACTGCTAG</i><br><i>AGATTTCAAAGTTCACGAGCCCCAGGCACATGCTCAGCCCTTCT</i><br><b>CCAAGTTAATCATAAACAGGCAAGATAAACAGATGTCCAAGGA</b><br><b>AA</b>                                                                                                                                                                               |
|       | 7:100483224      | JAK1               | 155    | 100   | <i>AAGCAAAAAGCAGATCTTGTCTTCGTTGGGAGTGAATTAGCCCTTCCAAA</i><br><b>ACCCCATTAACAAGGGAAAGGGGATAAAAAATAAATTTTTTTA</b>                                                                                                                                                                                                                                                     |
| TG-J  | 14:80829389      | ZNF512             | 46     | 100   | <b>TACCTGTGTGCGCCACCACCTGCCTAAGTTGACTCTTAGT</b><br><i>AGAGACGGGGTTCTGGAAGGGCTAATTCCTCCAACGAAGACAA</i>                                                                                                                                                                                                                                                               |
|       | 20:43696763      | ZNF778             | 295    | 99.32 | <i>CCAGTACAAGCAAAAAGCAGATCTTGTCTTCGTTGGGAGTGAATTAGCCC</i><br><i>TTCCACTATGAAAGTAAATTTTCATGCATTACTTCTTTTATACC</i><br><b>CATAATAGCCACATAATAATAATTAGACATCCTTATTTTTTCAAGAA</b><br><b>AAT</b>                                                                                                                                                                            |
| TG-D3 | 6:124325749      | PIKFYVE            | 683    | 100   | <i>AAAAGCAGATCTTGTCTTCGTTGGGAGTGAATTAGCCCTTCCATCAGGC</i><br><b>AACCACTATATCATTCTAATCCATTTTTA</b>                                                                                                                                                                                                                                                                    |
|       | 15:40004695      | THOC7              | 155    | 100   |                                                                                                                                                                                                                                                                                                                                                                     |

14

15

16 Supplementary Figure S1. Transgene expression in blood. Results of FACS analysis using whole  
 17 peripheral blood cells and leukocyte subsets from transgenic marmosets. The percentage of  
 18 GCaMP-positive cells is shown in the top right of each panel.

19

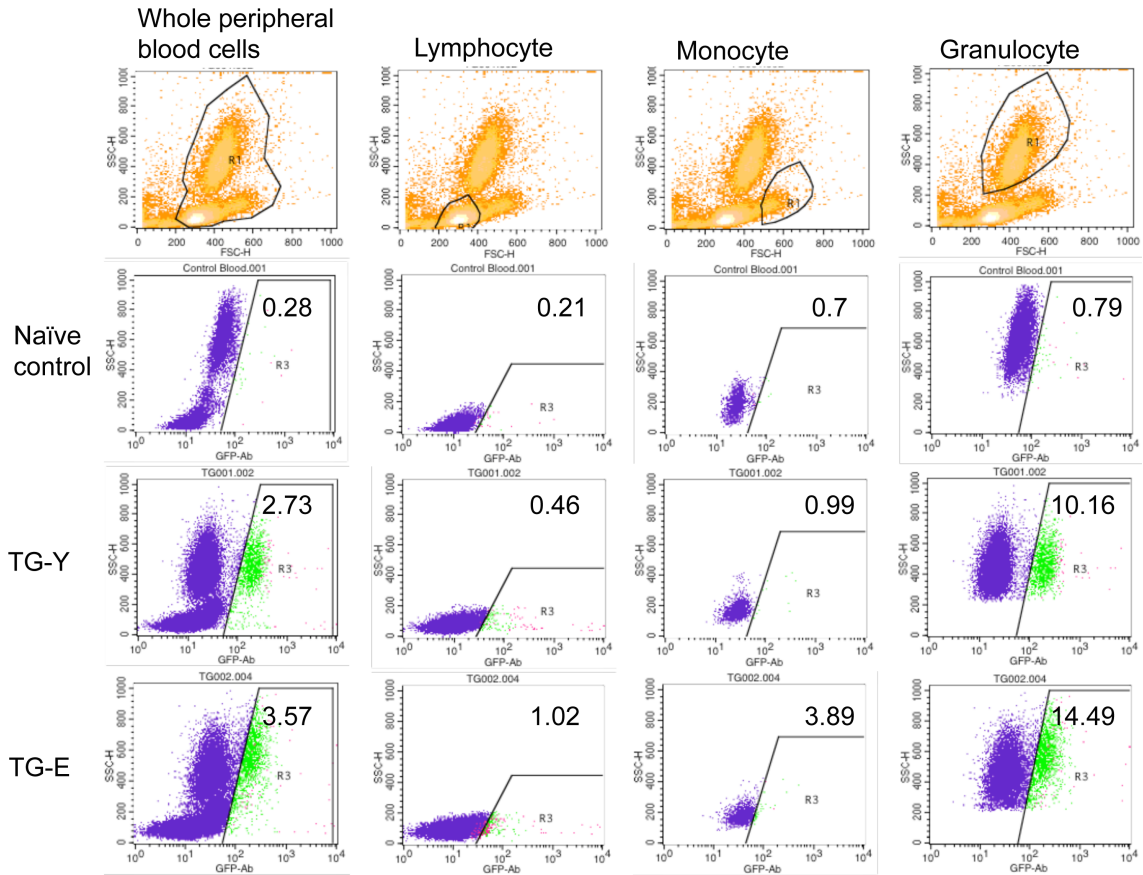

20  
21

22 Supplementary Figure S2. Stimulus evoked response of fibroblast cells derived from CMV-  
23 mKO-GCaMP6s (TG-E) and Syn-mKO-GCaMP6s (TG-D1) transgenic marmosets. (A-B) Images  
24 of GCaMP labeled cells derived from TG-E skin tissue before (A) and after (B) stimulation with  
25 calcium chloride show robust changes in fluorescence after the increase in intracellular calcium  
26 levels. (a-e) Time course of the changes in fluorescence in five example areas demarcated in A.  
27 (C-D) Images of GCaMP labeled cells derived from TG-D1 spinal cord tissue before (C) and  
28 after stimulations with calcium chloride. (f-j) Time course of the changes in fluorescence in five  
29 example areas demarcated in in C.

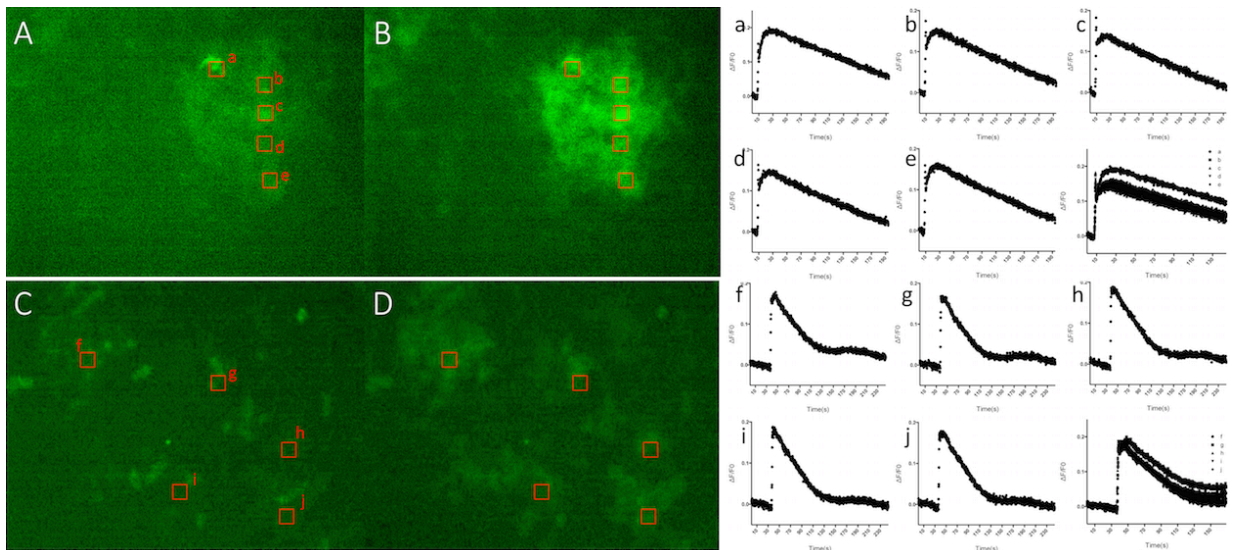

30  
31  
32
